# Supplementary material for: Functional characterization of Atlantic salmon (Salmo salar L.) PepT2 transporters
Source: PubMed Central journal article supplement — J Physiol. 2022 Apr 28;600(10):2377–400. doi: 10.1113/JP282781 (PMC9321897; doi:10.1113/jp282781), 2022-04-28
Supplement: TJP-600-2377-s001.pdf [file TJP-600-2377-s001.pdf]

# The Journal of Physiology

## Statistical Summary Document

**Manuscript Title:** Functional characterization of Atlantic salmon (*Salmo salar* L.) PepT2 transporters

**Authors:** Francesca Vacca, Ana S. Gomes, Koji Murashita, Raffella Cinquetti, Cristina Roseti, Amilcare Barca, Ivar Rønnestad, Tiziano Verri, Elena Bossi

**Animal model used, if applicable:** *Xenopus laevis* oocytes, *Salmon salar*

**Underlying hypothesis:** This investigation tests the hypothesis that both salmon transporter (PepT2a and PepT2b) are pH-dependent. Moreover, it tests if one of the two proteins characterized is more pH-dependent than the other. With the comparison, we have verified if in PepT2a the increasing of the pH has more impact on the reduction of the transport associated current respect to PepT2b.

**Definitions of ‘n’:** “n” is the number of oocytes; N is the number of the batched

### Statistical summary table:

| Experimental question number                                            | Finding/ conclusion                                       | Experimental location/variable | Mean value | Units | Standard Deviation | n/N  | Exact P value | Figure/table in which data are presented | Data comparisons | Statistical test  | Any other experimental factors | Comments                                                         |
|-------------------------------------------------------------------------|-----------------------------------------------------------|--------------------------------|------------|-------|--------------------|------|---------------|------------------------------------------|------------------|-------------------|--------------------------------|------------------------------------------------------------------|
| Is PepT2a inward current magnitude different between pH 5.5 and pH 6.5? | The inward currents at pH 5.5 and at pH 6.5 are different | pH 5.5                         | -685.04829 | nA    | 179.34367          | 18/4 | 0.0003213770  | Fig 5 and Fig. 6                         | pH 5.5 vs pH 6.5 | Mann Whitney test | Vh= -120 mV                    | At level 0.05, the two distributions are significantly different |
|                                                                         |                                                           | pH 6.5                         | -414.20695 | nA    | 168.78065          | 15/3 |               |                                          |                  |                   | Vh= -120 mV                    |                                                                  |
| Is PepT2a inward current magnitude different between pH 5.5 and pH 7.6? | The inward currents at pH 5.5 and at pH 7.6 are different | pH 5.5                         | -685.04829 | nA    | 179.34367          | 18/4 | < 0.0001      | Fig 5 and Fig. 6                         | pH 5.5 vs pH 7.6 | Mann Whitney test | Vh= -120 mV                    | At level 0.05, the two distributions are significantly different |
|                                                                         |                                                           | pH 7.6                         | -315.40847 | nA    | 122.99108          | 18/4 |               |                                          |                  |                   | Vh= -120 mV                    |                                                                  |
| Is PepT2a inward current magnitude different between pH 5.5 and pH 8.5? | The inward currents at pH 5.5 and at pH 8.5 are different | pH 5.5                         | -685.04829 | nA    | 179.34367          | 18/4 | 0.0009104360  | Fig 5 and Fig. 6                         | pH 5.5 vs pH 8.5 | Mann Whitney test | Vh= -120 mV                    | At level 0.05, the two distributions are significantly different |

|                                                                         |                                                           |        |            |    |               |      |                    |                     |                     |                          |                 |                                                                              |
|-------------------------------------------------------------------------|-----------------------------------------------------------|--------|------------|----|---------------|------|--------------------|---------------------|---------------------|--------------------------|-----------------|------------------------------------------------------------------------------|
|                                                                         |                                                           | pH 8.5 | -115.04935 | nA | 30.802<br>4   | 5/1  |                    |                     |                     |                          | Vh= -<br>120 mV |                                                                              |
| Is PepT2a inward current magnitude different between pH 6.5 and pH 7.6? | The inward currents at pH 6.5 and at pH 7.6 are different | pH 6.5 | -414.20695 | nA | 168.78<br>065 | 15/3 | 0.0611<br>800000   | Fig 5 and<br>Fig. 6 | pH 6.5 vs<br>pH 7.6 | Two-<br>sample<br>t test | Vh= -<br>120 mV | At level 0.05,<br>mean 6.5- mean<br>7.5 is NOT<br>significantly<br>different |
|                                                                         |                                                           | pH 7.6 | -315.40847 | nA | 122.99<br>108 | 18/4 |                    |                     |                     |                          | Vh= -<br>120 mV |                                                                              |
| Is PepT2a inward current magnitude different between pH 6.5 and pH 8.5? | The inward currents at pH 6.5 and at pH 8.5 are different | pH 6.5 | -414.20695 | nA | 168.78<br>065 | 15/3 | <<br><b>0.0001</b> | Fig 5 and<br>Fig. 6 | pH 6.5 vs<br>pH 8.5 | Two-<br>sample<br>t test | Vh= -<br>120 mV | At level 0.05,<br>mean 6.5- mean<br>8.5 is<br>significantly<br>different     |
|                                                                         |                                                           | pH 8.5 | -115.04935 | nA | 30.802<br>4   | 5/1  |                    |                     |                     |                          | Vh= -<br>120 mV |                                                                              |
| Is PepT2a inward current magnitude different between pH 7.6 and pH 8.5? | The inward currents at pH 7.6 and at pH 8.5 are different | pH 7.6 | -315.40847 | nA | 122.99<br>108 | 18/4 | <<br><b>0.0001</b> | Fig 5 and<br>Fig. 6 | pH 7.5 vs<br>pH 8.5 | Two-<br>sample<br>t test | Vh= -<br>120 mV | At level 0.05,<br>mean 7.6- mean<br>8.5 is<br>significantly<br>different     |
|                                                                         |                                                           | pH 8.5 | -115.04935 | nA | 30.802<br>4   | 5/1  |                    |                     |                     |                          | Vh= -<br>120 mV |                                                                              |
| Is PepT2a inward current magnitude different between pH 5.5 and pH 6.5? | The inward currents at pH 5.5 and at pH 6.5 are different | pH 5.5 | -185.55464 | nA | 55.454<br>56  | 18/4 | <<br><b>0.0001</b> | Fig 5 and<br>Fig. 6 | pH 5.5 vs<br>pH 6.5 | Two-<br>sample<br>t test | Vh= -60<br>mV   | At level 0.05,<br>mean 5.5- mean<br>6.5 is<br>significantly<br>different     |
|                                                                         |                                                           | pH 6.5 | -57.54316  | nA | 34.957<br>17  | 15/3 |                    |                     |                     |                          | Vh= -60<br>mV   |                                                                              |
| Is PepT2a inward current magnitude different between pH 5.5 and pH 7.6? | The inward currents at pH 5.5 and at pH 7.6 are different | pH 5.5 | -185.55464 | nA | 55.454<br>56  | 18/4 | <<br><b>0.0001</b> | Fig 5 and<br>Fig. 6 | pH 5.5 vs<br>pH 7.6 | Two-<br>sample<br>t test | Vh= -60<br>mV   | At level 0.05,<br>mean 5.5- mean<br>7.6 is<br>significantly<br>different     |
|                                                                         |                                                           | pH 7.6 | -31.89124  | nA | 16.765<br>53  | 18/4 |                    |                     |                     |                          | Vh= -60<br>mV   |                                                                              |
| Is PepT2a inward current magnitude different between pH 5.5 and pH 8.5? | The inward currents at pH 5.5 and at pH 8.5 are different | pH 5.5 | -185.55464 | nA | 55.454<br>56  | 18/4 | <<br><b>0.0001</b> | Fig 5 and<br>Fig. 6 | pH 6.5 vs<br>pH 8.5 | Two-<br>sample<br>t test | Vh= -60<br>mV   | At level 0.05,<br>mean 5.5- mean<br>8.5 is<br>significantly<br>different     |
|                                                                         |                                                           | pH 8.5 | -8.61457   | nA | 2.5453<br>8   | 5/1  |                    |                     |                     |                          | Vh= -60<br>mV   |                                                                              |
| Is PepT2a inward current magnitude different between pH 6.5 and pH 7.6? | The inward currents at pH 6.5 and at pH 7.6 are different | pH 6.5 | -57.54316  | nA | 34.957<br>17  | 15/3 | 0.0173<br>100000   | Fig 5 and<br>Fig. 6 | pH 6.5 vs<br>pH 7.6 | Two-<br>sample<br>t test | Vh= -60<br>mV   | At level 0.05,<br>mean 6.5- mean<br>7.6 is<br>significantly<br>different     |
|                                                                         |                                                           | pH 7.6 | -31.89124  | nA | 16.765<br>53  | 18/4 |                    |                     |                     |                          | Vh= -60<br>mV   |                                                                              |

|                                                                         |                                                               |        |            |    |              |      |                    |                     |                     |                          |                 |                                                                                 |
|-------------------------------------------------------------------------|---------------------------------------------------------------|--------|------------|----|--------------|------|--------------------|---------------------|---------------------|--------------------------|-----------------|---------------------------------------------------------------------------------|
| Is PepT2a inward current magnitude different between pH 6.5 and pH 8.5? | The inward currents at pH 6.5 and at pH 8.5 are different     | pH 6.5 | -57.54316  | nA | 34.957<br>17 | 15/3 | <<br><b>0.0001</b> | Fig 5 and<br>Fig. 6 | pH 6.5 vs<br>pH 8.5 | Two-<br>sample<br>t test | Vh= -60<br>mV   | At level 0.05,<br>mean 6.5- mean<br>8.5 is<br>significantly<br>different        |
|                                                                         |                                                               | pH 8.5 | -8.61457   | nA | 2.5453<br>8  | 5/1  |                    |                     |                     |                          | Vh= -60<br>mV   |                                                                                 |
| Is PepT2a inward current magnitude different between pH 7.6 and pH 8.5? | The inward currents at pH 7.6 and at pH 8.5 are different     | pH 7.6 | -31.89124  | nA | 16.765<br>53 | 18/4 | <<br><b>0.0001</b> | Fig 5 and<br>Fig. 6 | pH 7.6 vs<br>pH 8.5 | Two-<br>sample<br>t test | Vh= -60<br>mV   | At level 0.05,<br>mean 7.6- mean<br>8.5 is<br>significantly<br>different        |
|                                                                         |                                                               | pH 8.5 | -8.61457   | nA | 2.5453<br>8  | 5/1  |                    |                     |                     |                          | Vh= -60<br>mV   |                                                                                 |
| Is PepT2b inward current magnitude different between pH 5.5 and pH 6.5? | The inward currents at pH 5.5 and at pH 6.5 are different     | pH 5.5 | -296.29802 | nA | 97.761<br>59 | 7/3  | 0.0409<br>300000   | Fig 5 and<br>Fig. 6 | pH 5.5 vs<br>pH 6.5 | Two-<br>sample<br>t test | Vh= -<br>120 mV | at level 0.05,<br>mean 5.5- mean<br>6.5 is<br>significantly<br>different        |
|                                                                         |                                                               | pH 6.5 | -218.75509 | nA | 74.831<br>24 | 19/5 |                    |                     |                     |                          | Vh= -<br>120 mV |                                                                                 |
| Is PepT2b inward current magnitude different between pH 5.5 and pH 7.6? | The inward currents at pH 5.5 and at pH 7.6 are different     | pH 5.5 | -296.29802 | nA | 97.761<br>59 | 7/3  | 0.0012<br>100000   | Fig 5 and<br>Fig. 6 | pH 5.5 vs<br>pH 7.6 | Mann<br>Whitne<br>y test | Vh= -<br>120 mV | at level 0.05, the<br>two distributions<br>are significantly<br>different       |
|                                                                         |                                                               | pH 7.6 | -140.31496 | nA | 62.701<br>83 | 24/5 |                    |                     |                     |                          | Vh= -<br>120 mV |                                                                                 |
| Is PepT2b inward current magnitude different between pH 5.5 and pH 8.5? | The inward currents at pH 5.5 and at pH 8.5 are different     | pH 5.5 | -296.29802 | nA | 97.761<br>59 | 7/3  | 0.0034<br>000000   | Fig 5 and<br>Fig. 6 | pH 5.5 vs<br>pH 8.5 | Two-<br>sample<br>t test | Vh= -<br>120 mV | at level 0.05,<br>mean 5.5- mean<br>8.5 is<br>significantly<br>different        |
|                                                                         |                                                               | pH 8.5 | -93.0453   | nA | 34.660<br>56 | 4/2  |                    |                     |                     |                          | Vh= -<br>120 mV |                                                                                 |
| Is PepT2b inward current magnitude different between pH 6.5 and pH 7.6? | The inward currents at pH 6.5 and at pH 7.6 are different     | pH 6.5 | -218.75509 | nA | 74.831<br>24 | 19/5 | 0.0003<br>399640   | Fig 5 and<br>Fig. 6 | pH 6.5 vs<br>pH 7.6 | Mann<br>Whitne<br>y test | Vh= -<br>120 mV | at level 0.05, the<br>two distributions<br>are significantly<br>different       |
|                                                                         |                                                               | pH 7.6 | -140.31496 | nA | 62.701<br>83 | 24/5 |                    |                     |                     |                          | Vh= -<br>120 mV |                                                                                 |
| Is PepT2b inward current magnitude different between pH 6.5 and pH 8.5? | The inward currents at pH 6.5 and at pH 8.5 are different     | pH 6.5 | -218.75509 | nA | 74.831<br>24 | 19/5 | 0.0039<br>100000   | Fig 5 and<br>Fig. 6 | pH 6.5 vs<br>pH 8.5 | Two-<br>sample<br>t test | Vh= -<br>120 mV | at level 0.05,<br>mean 6.5- mean<br>8.5 is<br>significantly<br>different from 0 |
|                                                                         |                                                               | pH 8.5 | -93.0453   | nA | 34.660<br>56 | 4/2  |                    |                     |                     |                          | Vh= -<br>120 mV |                                                                                 |
| Is PepT2b inward current magnitude different between pH 7.6 and pH 8.5? | The inward currents at pH 7.6 and at pH 8.5 are not different | pH 7.6 | -140.31496 | nA | 62.701<br>83 | 24/5 | 0.1396<br>200000   | Fig 5 and<br>Fig. 6 | pH 7.6 vs<br>pH 8.5 | Mann<br>Whitne<br>y test | Vh= -<br>120 mV | at level 0.05, the<br>two distributions<br>are NOT                              |

|                                                                                |                                                               |                  |            |    |               |      |                    |                     |                     |                          |                 |                                                                                  |
|--------------------------------------------------------------------------------|---------------------------------------------------------------|------------------|------------|----|---------------|------|--------------------|---------------------|---------------------|--------------------------|-----------------|----------------------------------------------------------------------------------|
|                                                                                |                                                               | pH 8.5           | -93.0453   | nA | 34.660<br>56  | 4/2  |                    |                     |                     |                          | Vh= -<br>120 mV | significantly<br>different                                                       |
| Is PepT2b inward current magnitude different between pH 5.5 and pH 6.5?        | The inward currents at pH 5.5 and at pH 6.5 are different     | pH 5.5           | -55.18601  | nA | 26.856<br>62  | 7/3  | 0.0248<br>900000   | Fig 5 and<br>Fig. 6 | pH 5.5 vs<br>pH 6.5 | Two-<br>sample<br>t test | Vh= -60<br>mV   | at level 0.05,<br>mean 5.5- mean<br>6.5 is<br>significantly<br>different         |
|                                                                                |                                                               | pH 6.5           | -25.16157  | nA | 12.611<br>44  | 19/5 |                    |                     |                     |                          | Vh= -60<br>mV   |                                                                                  |
| Is PepT2b inward current magnitude different between pH 5.5 and pH 7.6?        | The inward currents at pH 5.5 and at pH 7.6 are different     | pH 5.5           | -55.18601  | nA | 26.856<br>62  | 7/3  | 0.0002<br>082630   | Fig 5 and<br>Fig. 6 | pH 5.5 vs<br>pH 7.6 | Mann<br>Whitne<br>y test | Vh= -60<br>mV   | at level 0.05, the<br>two distributions<br>are significantly<br>different        |
|                                                                                |                                                               | pH 7.6           | -10.21692  | nA | 6.3261<br>4   | 24/5 |                    |                     |                     |                          | Vh= -60<br>mV   |                                                                                  |
| Is PepT2b inward current magnitude different between pH 5.5 and pH 8.5?        | The inward currents at pH 5.5 and at pH 8.5 are different     | pH 5.5           | -55.18601  | nA | 26.856<br>62  | 7/3  | 0.0059<br>400000   | Fig 5 and<br>Fig. 6 | pH 6.5 vs<br>pH 8.5 | Two-<br>sample<br>t test | Vh= -60<br>mV   | at level 0.05,<br>mean 5.5- mean<br>8.5 is<br>significantly<br>different from 0  |
|                                                                                |                                                               | pH 8.5           | -5.85302   | nA | 2.9229        | 4/2  |                    |                     |                     |                          | Vh= -60<br>mV   |                                                                                  |
| Is PepT2b inward current magnitude different between pH 6.5 and pH 7.6?        | The inward currents at pH 6.5 and at pH 7.6 are different     | pH 6.5           | -25.16157  | nA | 12.611<br>44  | 19/5 | <<br><b>0.0001</b> | Fig 5 and<br>Fig. 6 | pH 6.5 vs<br>pH 7.6 | Mann<br>Whitne<br>y test | Vh= -60<br>mV   | at level 0.05, the<br>two distributions<br>are significantly<br>different        |
|                                                                                |                                                               | pH 7.6           | -10.21692  | nA | 6.3261<br>4   | 24/5 |                    |                     |                     |                          | Vh= -60<br>mV   |                                                                                  |
| Is PepT2b inward current magnitude different between pH 6.5 and pH 8.5?        | The inward currents at pH 6.5 and at pH 8.5 are different     | pH 6.5           | -25.16157  | nA | 12.611<br>44  | 19/5 | <<br><b>0.0001</b> | Fig 5 and<br>Fig. 6 | pH 6.5 vs<br>pH 8.5 | Two-<br>sample<br>t test | Vh= -60<br>mV   | at level 0.05,<br>mean 6.5- mean<br>8.5 is<br>significantly<br>different from 0  |
|                                                                                |                                                               | pH 8.5           | -5.85302   | nA | 2.9229        | 4/2  |                    |                     |                     |                          | Vh= -60<br>mV   |                                                                                  |
| Is PepT2b inward current magnitude different between pH 7.6 and pH 8.5?        | The inward currents at pH 7.6 and at pH 8.5 are not different | pH 7.6           | -10.21692  | nA | 6.3261<br>4   | 24/5 | 0.1580<br>800000   | Fig 5 and<br>Fig. 6 | pH 7.6 vs<br>pH 8.5 | Mann<br>Whitne<br>y test | Vh= -60<br>mV   | at level 0.05, the<br>two distributions<br>are NOT<br>significantly<br>different |
|                                                                                |                                                               | pH 8.5           | -5.85302   | nA | 2.9229        | 4/2  |                    |                     |                     |                          | Vh= -60<br>mV   |                                                                                  |
| Is the inward current magnitude at pH 5.5 different between PepT2a and PepT2b? | PepT2a and PepT2b inward currents at pH 5.5 are different     | PepT2a<br>pH 5.5 | -685.04829 | nA | 179.34<br>367 | 18/4 | 0.0001<br>55       | Fig 5 and<br>Fig. 6 | pH 5.5 vs<br>pH 5.5 | Mann<br>Whitne<br>y test | Vh= -<br>120 mV | at level 0.05, the<br>two distributions<br>are significantly<br>different        |
|                                                                                |                                                               | PepT2b<br>pH 5.5 | -296.29802 | nA | 97.761<br>59  | 7/3  |                    |                     |                     |                          | Vh= -<br>120 mV |                                                                                  |

|                                                                                |                                                                             |               |            |    |           |      |             |                  |                  |                   |             |                                                                                       |
|--------------------------------------------------------------------------------|-----------------------------------------------------------------------------|---------------|------------|----|-----------|------|-------------|------------------|------------------|-------------------|-------------|---------------------------------------------------------------------------------------|
| Is the inward current magnitude at pH 6.5 different between PepT2a and PepT2b? | PepT2a and PepT2b inward currents at pH 6.5 are different                   | PepT2a pH 6.5 | -414.20695 | nA | 168.78065 | 15/3 | 0.000551788 | Fig 5 and Fig. 6 | pH 6.5 vs pH 6.5 | Two-sample t test | Vh= -120 mV | at level 0.05, mean PepT2a 6.5- mean PepT2b 6.5 is significantly different from 0     |
|                                                                                |                                                                             | PepT2b pH 6.5 | -218.75509 | nA | 74.83124  | 19/5 |             |                  |                  |                   | Vh= -120 mV |                                                                                       |
| Is the inward current magnitude at pH 7.6 different between PepT2a and PepT2b? | PepT2a and PepT2b inward currents at pH 7.6 are different                   | PepT2a pH 7.6 | -315.40847 | nA | 122.99108 | 18/4 | < 0.0001    | Fig 5 and Fig. 6 | pH 7.6 vs pH 7.6 | Mann Whitney test | Vh= -120 mV | at level 0.05, the two distributions are significantly different                      |
|                                                                                |                                                                             | PepT2b pH 7.6 | -140.31496 | nA | 62.70183  | 24/5 |             |                  |                  |                   | Vh= -120 mV |                                                                                       |
| Is the inward current magnitude at pH 8.5 different between PepT2a and PepT2b? | PepT2a and PepT2b inward currents at pH 8.5 are NOT significantly different | PepT2a pH 8.5 | -115.04935 | nA | 30.8024   | 5/1  | 0.34661     | Fig 5 and Fig. 6 | pH 8.5 vs pH 8.5 | Two-sample t test | Vh= -120 mV | at level 0.05, mean PepT2a 8.5- mean PepT2b 8.5 is NOT significantly different from 0 |
|                                                                                |                                                                             | PepT2b pH 8.5 | -93.0453   | nA | 34.66056  | 4/2  |             |                  |                  |                   | Vh= -120 mV |                                                                                       |
| Is the inward current magnitude at pH 5.5 different between PepT2a and PepT2b? | PepT2a and PepT2b inward currents at pH 5.5 are different                   | PepT2a pH 5.5 | -185.55464 | nA | 55.45456  | 18/4 | < 0.0001    | Fig 5 and Fig. 6 | pH 5.5 vs pH 5.5 | Two-sample t test | Vh= -60 mV  | at level 0.05, mean PepT2a 5.5- mean PepT2b 5.5 is significantly different from 0     |
|                                                                                |                                                                             | PepT2b pH 5.5 | -55.18601  | nA | 26.85662  | 7/3  |             |                  |                  |                   | Vh= -60 mV  |                                                                                       |
| Is the inward current magnitude at pH 6.5 different between PepT2a and PepT2b? | PepT2a and PepT2b inward currents at pH 6.5 are different                   | PepT2a pH 6.5 | -57.54316  | nA | 34.95717  | 15/3 | 0.00332     | Fig 5 and Fig. 6 | pH 6.5 vs pH 6.5 | Two-sample t test | Vh= -60 mV  | at level 0.05, mean PepT2a 6.5- mean PepT2b 6.5 is significantly different from 0     |
|                                                                                |                                                                             | PepT2b pH 6.5 | -25.16157  | nA | 12.61144  | 19/5 |             |                  |                  |                   | Vh= -60 mV  |                                                                                       |
| Is the inward current magnitude at pH 7.6 different between PepT2a and PepT2b? | PepT2a and PepT2b inward currents at pH 7.6 are different                   | PepT2a pH 7.6 | -31.89124  | nA | 16.76553  | 18/4 | < 0.0001    | Fig 5 and Fig. 6 | pH 7.6 vs pH 7.6 | Mann Whitney test | Vh= -60 mV  | at level 0.05, the two distributions are significantly different                      |
|                                                                                |                                                                             | PepT2b pH 7.6 | -10.21692  | nA | 6.32614   | 24/5 |             |                  |                  |                   | Vh= -60 mV  |                                                                                       |
| Is the inward current magnitude at pH 8.5 different between PepT2a and PepT2b? | PepT2a and PepT2b inward currents at pH 8.5 are NOT significantly different | PepT2a pH 8.5 | -8.61457   | nA | 2.54538   | 5/1  | 0.17304     | Fig 5 and Fig. 6 | pH 8.5 vs pH 8.5 | Two-sample t test | Vh= -60 mV  | at level 0.05, mean PepT2a 8.5- mean PepT2b 8.5 is NOT significantly different from 0 |
|                                                                                |                                                                             | PepT2b pH 8.5 | -5.85302   | nA | 2.9229    | 4/2  |             |                  |                  |                   | Vh= -60 mV  |                                                                                       |

Data of the point of Figure 7- Data used for logistic fitting (Non linear curve fitting – Logistic Fit- By Origin)

All the data are also available [here](#)

| Dose response experiments- Questions: what is the concentration value that elicited half of the maximal current- question number | Finding/ conclusion See the logistic Values below | Concentration Voltages at different pH | Mean value | Standard Deviation | n  | Exact P value | Figure/table in which data are presented | Units | Data comparisons | Logistic fitting - Non Linear curve fit at each Voltages seebelow | Comments |
|----------------------------------------------------------------------------------------------------------------------------------|---------------------------------------------------|----------------------------------------|------------|--------------------|----|---------------|------------------------------------------|-------|------------------|-------------------------------------------------------------------|----------|
|                                                                                                                                  |                                                   | Voltage                                |            |                    |    | NA            | figure 7                                 | nA    | NA               | Non Linear curve fit                                              |          |
|                                                                                                                                  |                                                   | 0.003 mM                               |            |                    |    |               |                                          |       |                  |                                                                   |          |
| PepT2a pH 5.5                                                                                                                    |                                                   | -140                                   | -19,6698   | 24,21009           | 13 | NA            | figure 7                                 | nA    | NA               |                                                                   |          |
|                                                                                                                                  |                                                   | -120                                   | -14,06236  | 13,16814           | 13 | NA            | figure 7                                 | nA    | NA               |                                                                   |          |
|                                                                                                                                  |                                                   | -100                                   | -9,73966   | 7,07265            | 13 | NA            | figure 7                                 | nA    | NA               |                                                                   |          |
|                                                                                                                                  |                                                   | -80                                    | -5,91677   | 3,58982            | 13 | NA            | figure 7                                 | nA    | NA               |                                                                   |          |
|                                                                                                                                  |                                                   | -60                                    | -3,06073   | 2,24092            | 13 | NA            | figure 7                                 | nA    | NA               |                                                                   |          |
|                                                                                                                                  |                                                   | -40                                    | -1,18392   | 1,58449            | 13 | NA            | figure 7                                 | nA    | NA               |                                                                   |          |
|                                                                                                                                  |                                                   | -20                                    | 0,30542    | 0,45053            | 13 | NA            | figure 7                                 | nA    | NA               |                                                                   |          |
|                                                                                                                                  |                                                   | 0                                      | 0,68732    | 0,52824            | 13 | NA            | figure 7                                 | nA    | NA               |                                                                   |          |
|                                                                                                                                  |                                                   | 20                                     | 1,1542     | 1,1903             | 13 | NA            | figure 7                                 | nA    | NA               |                                                                   |          |
|                                                                                                                                  |                                                   | 0.010 mM                               |            |                    |    | NA            | figure 7                                 | nA    | NA               |                                                                   |          |
|                                                                                                                                  |                                                   | -140                                   | -45,40925  | 18,44605           | 13 | NA            | figure 7                                 | nA    | NA               |                                                                   |          |
|                                                                                                                                  |                                                   | -120                                   | -45,14058  | 18,76268           | 13 | NA            | figure 7                                 | nA    | NA               |                                                                   |          |
|                                                                                                                                  |                                                   | -100                                   | -41,37996  | 18,79625           | 13 | NA            | figure 7                                 | nA    | NA               |                                                                   |          |
|                                                                                                                                  |                                                   | -80                                    | -39,02208  | 17,64049           | 13 | NA            | figure 7                                 | nA    | NA               |                                                                   |          |
|                                                                                                                                  |                                                   | -60                                    | -35,53855  | 16,24452           | 13 | NA            | figure 7                                 | nA    | NA               |                                                                   |          |
|                                                                                                                                  |                                                   | -40                                    | -29,76078  | 14,24817           | 13 | NA            | figure 7                                 | nA    | NA               |                                                                   |          |
|                                                                                                                                  |                                                   | -20                                    | -21,60138  | 11,74227           | 13 | NA            | figure 7                                 | nA    | NA               |                                                                   |          |

|  |  |          |            |          |    |    |          |    |    |  |  |
|--|--|----------|------------|----------|----|----|----------|----|----|--|--|
|  |  | 0        | -12,36149  | 8,79315  | 13 | NA | figure 7 | nA | NA |  |  |
|  |  | 20       | -4,34442   | 6,63662  | 13 | NA | figure 7 | nA | NA |  |  |
|  |  | 0.030 mM |            |          |    | NA | figure 7 | nA | NA |  |  |
|  |  | -140     | -141,75698 | 54,98042 | 13 | NA | figure 7 | nA | NA |  |  |
|  |  | -120     | -143,08507 | 51,35437 | 13 | NA | figure 7 | nA | NA |  |  |
|  |  | -100     | -137,82525 | 49,80123 | 13 | NA | figure 7 | nA | NA |  |  |
|  |  | -80      | -127,58021 | 46,56792 | 13 | NA | figure 7 | nA | NA |  |  |
|  |  | -60      | -109,7779  | 41,406   | 13 | NA | figure 7 | nA | NA |  |  |
|  |  | -40      | -84,59453  | 33,66156 | 13 | NA | figure 7 | nA | NA |  |  |
|  |  | -20      | -55,65365  | 23,67906 | 13 | NA | figure 7 | nA | NA |  |  |
|  |  | 0        | -30,0572   | 13,1024  | 13 | NA | figure 7 | nA | NA |  |  |
|  |  | 20       | -14,74139  | 5,51107  | 13 | NA | figure 7 | nA | NA |  |  |
|  |  | 0.1 mM   |            |          |    | NA | figure 7 | nA | NA |  |  |
|  |  | -140     | -449,02301 | 152,7849 | 13 | NA | figure 7 | nA | NA |  |  |
|  |  | -120     | -410,95239 | 136,2264 | 13 | NA | figure 7 | nA | NA |  |  |
|  |  | -100     | -353,51106 | 120,4342 | 13 | NA | figure 7 | nA | NA |  |  |
|  |  | -80      | -277,95751 | 99,12299 | 13 | NA | figure 7 | nA | NA |  |  |
|  |  | -60      | -194,0035  | 73,92585 | 13 | NA | figure 7 | nA | NA |  |  |
|  |  | -40      | -116,89401 | 47,48605 | 13 | NA | figure 7 | nA | NA |  |  |
|  |  | -20      | -59,69508  | 25,49534 | 13 | NA | figure 7 | nA | NA |  |  |
|  |  | 0        | -26,47275  | 11,01342 | 13 | NA | figure 7 | nA | NA |  |  |
|  |  | 20       | -11,25419  | 4,10595  | 13 | NA | figure 7 | nA | NA |  |  |
|  |  | 0.3 mM   |            |          |    | NA | figure 7 | nA | NA |  |  |
|  |  | -140     | -721,17194 | 286,4182 | 12 | NA | figure 7 | nA | NA |  |  |
|  |  | -120     | -595,79314 | 235,888  | 12 | NA | figure 7 | nA | NA |  |  |
|  |  | -100     | -453,00699 | 186,4632 | 12 | NA | figure 7 | nA | NA |  |  |
|  |  | -80      | -315,29247 | 133,5915 | 12 | NA | figure 7 | nA | NA |  |  |
|  |  | -60      | -195,14587 | 86,10958 | 12 | NA | figure 7 | nA | NA |  |  |
|  |  | -40      | -105,41385 | 48,81812 | 12 | NA | figure 7 | nA | NA |  |  |
|  |  | -20      | -49,75481  | 23,75893 | 12 | NA | figure 7 | nA | NA |  |  |
|  |  | 0        | -21,76462  | 10,56826 | 12 | NA | figure 7 | nA | NA |  |  |

|               |  |         |            |          |    |    |          |    |    |  |  |
|---------------|--|---------|------------|----------|----|----|----------|----|----|--|--|
|               |  | 20      | -10,49744  | 4,70176  | 12 | NA | figure 7 | nA | NA |  |  |
|               |  | 1 mM    |            |          |    | NA | figure 7 | nA | NA |  |  |
|               |  | -140    | -900,71813 | 274,0539 | 13 | NA | figure 7 | nA | NA |  |  |
|               |  | -120    | -695,08735 | 205,824  | 13 | NA | figure 7 | nA | NA |  |  |
|               |  | -100    | -496,06104 | 149,9451 | 13 | NA | figure 7 | nA | NA |  |  |
|               |  | -80     | -322,38128 | 103,1325 | 13 | NA | figure 7 | nA | NA |  |  |
|               |  | -60     | -186,47239 | 64,41025 | 13 | NA | figure 7 | nA | NA |  |  |
|               |  | -40     | -94,7244   | 35,27849 | 13 | NA | figure 7 | nA | NA |  |  |
|               |  | -20     | -42,84316  | 16,47859 | 13 | NA | figure 7 | nA | NA |  |  |
|               |  | 0       | -19,31509  | 6,40624  | 13 | NA | figure 7 | nA | NA |  |  |
|               |  | 20      | -10,224    | 3,28069  | 13 | NA | figure 7 | nA | NA |  |  |
|               |  | 3 mM    |            |          |    | NA | figure 7 | nA | NA |  |  |
|               |  | -140    | -884,62328 | 253,2572 | 13 | NA | figure 7 | nA | NA |  |  |
|               |  | -120    | -657,43953 | 185,0175 | 13 | NA | figure 7 | nA | NA |  |  |
|               |  | -100    | -454,99373 | 134,2064 | 13 | NA | figure 7 | nA | NA |  |  |
|               |  | -80     | -286,67852 | 90,78948 | 13 | NA | figure 7 | nA | NA |  |  |
|               |  | -60     | -161,46458 | 55,11851 | 13 | NA | figure 7 | nA | NA |  |  |
|               |  | -40     | -80,09138  | 29,31013 | 13 | NA | figure 7 | nA | NA |  |  |
|               |  | -20     | -36,28336  | 13,44217 | 13 | NA | figure 7 | nA | NA |  |  |
|               |  | 0       | -17,01375  | 5,78899  | 13 | NA | figure 7 | nA | NA |  |  |
|               |  | 20      | -9,41353   | 3,10901  | 13 | NA | figure 7 | nA | NA |  |  |
|               |  |         |            |          |    |    |          |    |    |  |  |
|               |  |         |            |          |    |    |          |    |    |  |  |
| PepT2a pH 6.5 |  | 0.003mM |            |          |    | NA | figure 7 | nA | NA |  |  |
|               |  | -140    | -12,28749  | 7,63209  | 10 | NA | figure 7 | nA | NA |  |  |
|               |  | -120    | -11,92613  | 7,37817  | 10 | NA | figure 7 | nA | NA |  |  |
|               |  | -100    | -10,97703  | 6,90712  | 10 | NA | figure 7 | nA | NA |  |  |
|               |  | -80     | -9,60922   | 6,53775  | 10 | NA | figure 7 | nA | NA |  |  |
|               |  | -60     | -7,43445   | 5,26804  | 10 | NA | figure 7 | nA | NA |  |  |
|               |  | -40     | -4,53693   | 3,51694  | 10 | NA | figure 7 | nA | NA |  |  |
|               |  | -20     | -1,7936    | 1,46418  | 10 | NA | figure 7 | nA | NA |  |  |



|  |  |          |            |          |    |    |          |    |    |  |  |
|--|--|----------|------------|----------|----|----|----------|----|----|--|--|
|  |  | 0        | 0,14155    | 0,74664  | 10 | NA | figure 7 | nA | NA |  |  |
|  |  | 20       | 1,15288    | 1,36668  | 10 | NA | figure 7 | nA | NA |  |  |
|  |  | 0.010 mM |            |          |    | NA | figure 7 | nA | NA |  |  |
|  |  | -140     | -33,48093  | 22,05971 | 10 | NA | figure 7 | nA | NA |  |  |
|  |  | -120     | -32,07005  | 20,95832 | 10 | NA | figure 7 | nA | NA |  |  |
|  |  | -100     | -30,00388  | 19,88136 | 10 | NA | figure 7 | nA | NA |  |  |
|  |  | -80      | -25,12175  | 16,93189 | 10 | NA | figure 7 | nA | NA |  |  |
|  |  | -60      | -18,53559  | 12,66852 | 10 | NA | figure 7 | nA | NA |  |  |
|  |  | -40      | -10,7103   | 7,74298  | 10 | NA | figure 7 | nA | NA |  |  |
|  |  | -20      | -3,80919   | 3,11531  | 10 | NA | figure 7 | nA | NA |  |  |
|  |  | 0        | 0,95485    | 1,3497   | 10 | NA | figure 7 | nA | NA |  |  |
|  |  | 20       | 3,96016    | 2,44993  | 10 | NA | figure 7 | nA | NA |  |  |
|  |  | 0.030 mM |            |          |    | NA | figure 7 | nA | NA |  |  |
|  |  | -140     | -142,73652 | 37,31294 | 10 | NA | figure 7 | nA | NA |  |  |
|  |  | -120     | -131,81886 | 40,18971 | 10 | NA | figure 7 | nA | NA |  |  |
|  |  | -100     | -113,65665 | 41,13756 | 10 | NA | figure 7 | nA | NA |  |  |
|  |  | -80      | -86,44741  | 37,74957 | 10 | NA | figure 7 | nA | NA |  |  |
|  |  | -60      | -53,55635  | 27,12789 | 10 | NA | figure 7 | nA | NA |  |  |
|  |  | -40      | -25,92289  | 13,72065 | 10 | NA | figure 7 | nA | NA |  |  |
|  |  | -20      | -8,53001   | 4,26969  | 10 | NA | figure 7 | nA | NA |  |  |
|  |  | 0        | 0,74243    | 2,16292  | 10 | NA | figure 7 | nA | NA |  |  |
|  |  | 20       | 5,52811    | 3,87993  | 10 | NA | figure 7 | nA | NA |  |  |
|  |  | 0.1 mM   |            |          |    | NA | figure 7 | nA | NA |  |  |
|  |  | -140     | -394,5445  | 130,2183 | 10 | NA | figure 7 | nA | NA |  |  |
|  |  | -120     | -320,09359 | 116,7341 | 10 | NA | figure 7 | nA | NA |  |  |
|  |  | -100     | -235,13894 | 98,60353 | 10 | NA | figure 7 | nA | NA |  |  |
|  |  | -80      | -145,47877 | 68,75367 | 10 | NA | figure 7 | nA | NA |  |  |
|  |  | -60      | -74,30569  | 38,38694 | 10 | NA | figure 7 | nA | NA |  |  |
|  |  | -40      | -32,00047  | 16,60279 | 10 | NA | figure 7 | nA | NA |  |  |
|  |  | -20      | -11,74826  | 5,46621  | 10 | NA | figure 7 | nA | NA |  |  |
|  |  | 0        | -2,24231   | 1,46682  | 10 | NA | figure 7 | nA | NA |  |  |



|               |  |                 |            |          |    |    |          |    |    |  |  |
|---------------|--|-----------------|------------|----------|----|----|----------|----|----|--|--|
|               |  |                 |            |          |    |    |          |    |    |  |  |
|               |  | 20              | -3,02662   | 2,1968   | 8  | NA | figure 7 | nA | NA |  |  |
| PepT2a pH 7.6 |  | 0.003mM/Voltage |            |          |    | NA | figure 7 | nA | NA |  |  |
|               |  | -140            | -19,6698   | 24,21009 | 13 | NA | figure 7 | nA | NA |  |  |
|               |  | -120            | -14,06236  | 13,16814 | 13 | NA | figure 7 | nA | NA |  |  |
|               |  | -100            | -9,73966   | 7,07265  | 13 | NA | figure 7 | nA | NA |  |  |
|               |  | -80             | -5,91677   | 3,58982  | 13 | NA | figure 7 | nA | NA |  |  |
|               |  | -60             | -3,06073   | 2,24092  | 13 | NA | figure 7 | nA | NA |  |  |
|               |  | -40             | -1,18392   | 1,58449  | 13 | NA | figure 7 | nA | NA |  |  |
|               |  | -20             | 0,30542    | 0,45053  | 13 | NA | figure 7 | nA | NA |  |  |
|               |  | 0               | 0,68732    | 0,52824  | 13 | NA | figure 7 | nA | NA |  |  |
|               |  | 20              | 1,1542     | 1,1903   | 12 | NA | figure 7 | nA | NA |  |  |
|               |  | 0.010 mM        |            |          |    | NA | figure 7 | nA | NA |  |  |
|               |  | -140            | -36,61727  | 13,54422 | 12 | NA | figure 7 | nA | NA |  |  |
|               |  | -120            | -31,00744  | 11,88823 | 12 | NA | figure 7 | nA | NA |  |  |
|               |  | -100            | -24,36086  | 8,70327  | 12 | NA | figure 7 | nA | NA |  |  |
|               |  | -80             | -15,34446  | 5,50908  | 12 | NA | figure 7 | nA | NA |  |  |
|               |  | -60             | -6,63075   | 2,90894  | 12 | NA | figure 7 | nA | NA |  |  |
|               |  | -40             | -1,04316   | 1,03258  | 12 | NA | figure 7 | nA | NA |  |  |
|               |  | -20             | 1,69775    | 1,27999  | 12 | NA | figure 7 | nA | NA |  |  |
|               |  | 0               | 2,72581    | 1,87532  | 12 | NA | figure 7 | nA | NA |  |  |
|               |  | 20              | 2,87856    | 2,32609  | 12 | NA | figure 7 | nA | NA |  |  |
|               |  | 0.030 mM        |            |          |    | NA | figure 7 | nA | NA |  |  |
|               |  | -140            | -148,82168 | 146,6094 | 12 | NA | figure 7 | nA | NA |  |  |
|               |  | -120            | -110,64419 | 80,73061 | 12 | NA | figure 7 | nA | NA |  |  |
|               |  | -100            | -73,03941  | 37,26409 | 12 | NA | figure 7 | nA | NA |  |  |
|               |  | -80             | -39,62528  | 17,24076 | 12 | NA | figure 7 | nA | NA |  |  |
|               |  | -60             | -16,14825  | 7,95609  | 12 | NA | figure 7 | nA | NA |  |  |
|               |  | -40             | -3,41429   | 2,21446  | 12 | NA | figure 7 | nA | NA |  |  |
|               |  | -20             | 2,76911    | 1,99889  | 12 | NA | figure 7 | nA | NA |  |  |
|               |  | 0               | 5,1932     | 2,84464  | 12 | NA | figure 7 | nA | NA |  |  |

|  |  |        |            |          |    |    |          |    |    |  |  |
|--|--|--------|------------|----------|----|----|----------|----|----|--|--|
|  |  | 20     | 6,21502    | 2,92389  | 12 | NA | figure 7 | nA | NA |  |  |
|  |  | 0.1 mM |            |          |    | NA | figure 7 | nA | NA |  |  |
|  |  | -140   | -248,70577 | 56,62532 | 12 | NA | figure 7 | nA | NA |  |  |
|  |  | -120   | -188,04141 | 56,09359 | 12 | NA | figure 7 | nA | NA |  |  |
|  |  | -100   | -119,94007 | 47,06892 | 12 | NA | figure 7 | nA | NA |  |  |
|  |  | -80    | -61,29143  | 30,07735 | 12 | NA | figure 7 | nA | NA |  |  |
|  |  | -60    | -24,84662  | 13,5336  | 12 | NA | figure 7 | nA | NA |  |  |
|  |  | -40    | -6,83632   | 3,66999  | 12 | NA | figure 7 | nA | NA |  |  |
|  |  | -20    | 0,72839    | 1,56234  | 12 | NA | figure 7 | nA | NA |  |  |
|  |  | 0      | 4,21896    | 3,52598  | 12 | NA | figure 7 | nA | NA |  |  |
|  |  | 20     | 5,91327    | 4,75647  | 12 | NA | figure 7 | nA | NA |  |  |
|  |  | 0.3 mM |            |          |    | NA | figure 7 | nA | NA |  |  |
|  |  | -140   | -445,88384 | 136,3116 | 13 | NA | figure 7 | nA | NA |  |  |
|  |  | -120   | -299,05589 | 114,2744 | 13 | NA | figure 7 | nA | NA |  |  |
|  |  | -100   | -173,86878 | 81,28112 | 13 | NA | figure 7 | nA | NA |  |  |
|  |  | -80    | -84,75599  | 45,59412 | 13 | NA | figure 7 | nA | NA |  |  |
|  |  | -60    | -35,20349  | 20,41397 | 13 | NA | figure 7 | nA | NA |  |  |
|  |  | -40    | -11,89637  | 6,86029  | 13 | NA | figure 7 | nA | NA |  |  |
|  |  | -20    | -2,50726   | 1,15109  | 13 | NA | figure 7 | nA | NA |  |  |
|  |  | 0      | 2,11487    | 2,63253  | 13 | NA | figure 7 | nA | NA |  |  |
|  |  | 20     | 4,64948    | 3,86386  | 13 | NA | figure 7 | nA | NA |  |  |
|  |  | 1 mM   |            |          |    | NA | figure 7 | nA | NA |  |  |
|  |  | -140   | -570,61757 | 199,6628 | 13 | NA | figure 7 | nA | NA |  |  |
|  |  | -120   | -345,81609 | 131,348  | 13 | NA | figure 7 | nA | NA |  |  |
|  |  | -100   | -183,54041 | 78,41517 | 13 | NA | figure 7 | nA | NA |  |  |
|  |  | -80    | -85,26146  | 40,28269 | 13 | NA | figure 7 | nA | NA |  |  |
|  |  | -60    | -35,82433  | 18,18969 | 13 | NA | figure 7 | nA | NA |  |  |
|  |  | -40    | -14,21908  | 7,3672   | 13 | NA | figure 7 | nA | NA |  |  |
|  |  | -20    | -5,64447   | 2,77156  | 13 | NA | figure 7 | nA | NA |  |  |
|  |  | 0      | -2,16609   | 1,58969  | 13 | NA | figure 7 | nA | NA |  |  |
|  |  | 20     | -0,29359   | 1,53123  | 13 | NA | figure 7 | nA | NA |  |  |

|  |  |      |            |          |    |    |          |    |    |  |  |
|--|--|------|------------|----------|----|----|----------|----|----|--|--|
|  |  | 3 mM |            |          |    | NA | figure 7 | nA | NA |  |  |
|  |  | -140 | -621,64426 | 195,8703 | 13 | NA | figure 7 | nA | NA |  |  |
|  |  | -120 | -377,48575 | 129,8848 | 13 | NA | figure 7 | nA | NA |  |  |
|  |  | -100 | -202,08734 | 78,96129 | 13 | NA | figure 7 | nA | NA |  |  |
|  |  | -80  | -96,05271  | 41,75702 | 13 | NA | figure 7 | nA | NA |  |  |
|  |  | -60  | -42,41259  | 19,79581 | 13 | NA | figure 7 | nA | NA |  |  |
|  |  | -40  | -18,17374  | 9,46128  | 13 | NA | figure 7 | nA | NA |  |  |
|  |  | -20  | -7,87897   | 4,76364  | 13 | NA | figure 7 | nA | NA |  |  |
|  |  | 0    | -3,65213   | 3,88923  | 13 | NA | figure 7 | nA | NA |  |  |
|  |  | 20   | -1,73662   | 3,714    | 13 | NA | figure 7 | nA | NA |  |  |
|  |  |      |            |          |    |    |          |    |    |  |  |

**Fitting reported in Figure 8 from the data of Figure 7 reported above (Row data available here: DOI 10.17605/OSF.IO/563SB )**

| Dose response experiments-<br>Questions: what is the concentration value that elicited half of the maximal current- | Voltages tested | K05 at indicated Voltages and pH determined by Origin Logistic fitting | SE (determined by origin Fitting) | Maximal current determined by Origin Logistic fitting | (value)  | P Value | Figure in which the data are presented | Units | e.g. observation                                |
|---------------------------------------------------------------------------------------------------------------------|-----------------|------------------------------------------------------------------------|-----------------------------------|-------------------------------------------------------|----------|---------|----------------------------------------|-------|-------------------------------------------------|
|                                                                                                                     |                 | K05                                                                    | SE                                | Imax                                                  | SE       |         |                                        |       | Raw data available<br>DOI 10.17605/OSF.IO/563SB |
|                                                                                                                     | -140            | 0,17975                                                                | 0,02544                           | -1021,32                                              | 86,37902 | NA      | figure 8                               | mM/nA |                                                 |
|                                                                                                                     | -120            | 0,13254                                                                | 0,01944                           | -758,359                                              | 62,43026 | NA      | figure 8                               | mM/nA |                                                 |
|                                                                                                                     | -100            | 0,09671                                                                | 0,01726                           | -528,562                                              | 49,13556 | NA      | figure 8                               | mM/nA |                                                 |
|                                                                                                                     | -80             | 0,06264                                                                | 0,0126                            | -336,624                                              | 33,19138 | NA      | figure 8                               | mM/nA |                                                 |
|                                                                                                                     | -60             | 0,03718                                                                | 0,0092                            | -193,081                                              | 20,81119 | NA      | figure 8                               | mM/nA |                                                 |



| Logistic fitting<br>Value pH5.5<br>Pept2b |      | K05     | SE       | lmax     | SE       |    | figure 8 | mM/nA |  |
|-------------------------------------------|------|---------|----------|----------|----------|----|----------|-------|--|
|                                           | -140 | 0,05014 | 0,00773  | -544,127 | 42,39377 | NA | figure 8 | mM/nA |  |
|                                           | -120 | 0,03513 | 0,00545  | -370,82  | 27,65473 | NA | figure 8 | mM/nA |  |
|                                           | -100 | 0,02201 | 0,00263  | -230,532 | 12,27662 | NA | figure 8 | mM/nA |  |
|                                           | -80  | 0,01299 | 0,00157  | -131,12  | 6,62477  | NA | figure 8 | mM/nA |  |
|                                           | -60  | 0,00786 | 0,0012   | -69,2083 | 4,01487  | NA | figure 8 | mM/nA |  |
|                                           | -40  | 0,00457 | 0,00104  | -34,8359 | 2,54826  | NA | figure 8 | mM/nA |  |
|                                           | -20  | 0,00261 | 8,55E-04 | -18,8106 | 1,42946  | NA | figure 8 | mM/nA |  |
|                                           | 0    | 0,00185 | 0,00193  | -13,1224 | 0,94759  | NA | figure 8 | mM/nA |  |
|                                           | 20   | 0,001   | 0,00262  | -12,047  | 0,84782  | NA | figure 8 | mM/nA |  |
|                                           |      |         |          |          |          | NA | figure 8 | mM/nA |  |
|                                           |      |         |          |          |          |    |          |       |  |
| Logistic fitting<br>Value pH6.5<br>Pept2b |      | K05     | SE       | lmax     | SE       |    | figure 8 | mM/nA |  |
|                                           | -140 | 0,04997 | 0,00548  | -478,567 | 31,47564 | NA | figure 8 | mM/nA |  |
|                                           | -120 | 0,0325  | 0,00331  | -276,052 | 15,7031  | NA | figure 8 | mM/nA |  |
|                                           | -100 | 0,0195  | 0,00166  | -141,173 | 6,18895  | NA | figure 8 | mM/nA |  |
|                                           | -80  | 0,01158 | 0,00172  | -62,9174 | 4,17893  | NA | figure 8 | mM/nA |  |
|                                           | -60  | 0,00664 | 0,00141  | -25,1734 | 1,89823  | NA | figure 8 | mM/nA |  |
|                                           | -40  | 0,00448 | 0,00111  | -9,91532 | 0,70549  | NA | figure 8 | mM/nA |  |
|                                           | -20  | 0,00492 | 2,38E-04 | -4,23198 | 0,07446  | NA | figure 8 | mM/nA |  |
|                                           | 0    | 0,02011 | 0,00657  | -2,21925 | 0,20752  | NA | figure 8 | mM/nA |  |
|                                           | 20   |         |          |          |          |    |          |       |  |
|                                           |      |         |          |          |          |    |          |       |  |
| Logistic fitting<br>Value pH7.6<br>Pept2b |      | K05     | SE       | lmax     | SE       | NA | figure 8 | mM/nA |  |
|                                           | -140 | 0,04997 | 0,00548  | -478,567 | 31,47564 | NA | figure 8 | mM/nA |  |
|                                           | -120 | 0,0325  | 0,00331  | -276,052 | 15,7031  | NA | figure 8 | mM/nA |  |
|                                           | -100 | 0,0195  | 0,00166  | -141,173 | 6,18895  | NA | figure 8 | mM/nA |  |
|                                           | -80  | 0,01158 | 0,00172  | -62,9174 | 4,17893  | NA | figure 8 | mM/nA |  |

|  |     |         |          |          |         |    |          |       |  |
|--|-----|---------|----------|----------|---------|----|----------|-------|--|
|  | -60 | 0,00664 | 0,00141  | -25,1734 | 1,89823 | NA | figure 8 | mM/nA |  |
|  | -40 | 0,00448 | 0,00111  | -9,91532 | 0,70549 | NA | figure 8 | mM/nA |  |
|  | -20 | 0,00492 | 2,38E-04 | -4,23198 | 0,07446 | NA | figure 8 | mM/nA |  |
|  | 0   | 0,02011 | 0,00657  | -2,21925 | 0,20752 | NA | figure 8 | mM/nA |  |
|  | 20  |         |          |          |         |    |          |       |  |
